# Supplementary material for: Early Morphological Changes of the Rectus Femoris Muscle and Deep Fascia in Ullrich Congenital Muscular Dystrophy
Source: MDPI journal article supplement (doi:10.3390/ijerph19031252), 2022-01-23
Supplement: s1 [file s1]

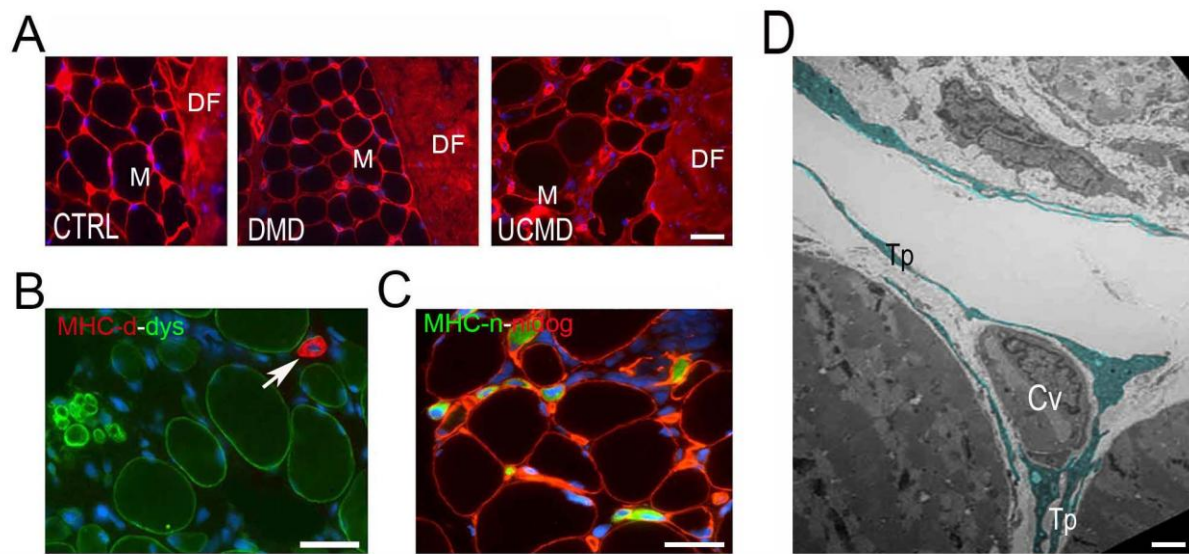

**Figure S1. A.** Immunofluorescence analysis of collagen I on cross sections of muscle/deep fascia biopsy from a non-dystrophic control (CTRL), a Duchenne muscular dystrophy patient (DMD), and the UCMD patient (UCMD). In all samples, deep fascia (DF) appears as a fibrous sheet covering the muscle (M). Nuclei, DAPI. Scale bar, 50  $\mu$ m. **B.** Immunohistochemical analysis of the sarcolemmal component dystrophin (dys, green) and developmental myosin heavy chain (MHC-d, red) on muscle sections of the UCMD patient. Despite the presence of several hypotrophic fibers, only one show regeneration features (arrow). Nuclei, DAPI. Scale bar, 50  $\mu$ m. **C.** Immunohistochemical analysis of the basement membrane component nidogen (nidog, red) and neonatal myosin heavy chain (MHC-d, green) on muscle sections of the UCMD patient showing some small regenerating muscle cells. Nuclei, DAPI. Scale bar, 50  $\mu$ m. **D.** Ultrastructural analysis of UCMD muscle biopsy showing the presence of several telocytes (digitally colored in green) in the endomysium. A capillary vessel (Cv) appear almost completely wrapped by telocytes cytoplasmic processes (telopodes, Tp). Scale bar, 1  $\mu$ m.
